# Supplementary material for: DTBDT-TTPD: a new dithienobenzodithiophene-based small molecule for use in efficient photovoltaic devices
Source: Royal Society of Chemistry journal article supplement (doi:10.1039/c4ta03745f), 2014-01-01
Supplement: c4ta03745f1.pdf [file c4ta03745f1.pdf]

**Electronic supplementary information (ESI)**

**DTBDT-TTPD: A new dithienobenzodithiophene-based small molecule for use in efficient photovoltaic devices**

Ye Rim Cheon,<sup>a‡</sup> Yu Jin Kim,<sup>b‡</sup> Jang Yeol Back,<sup>c</sup> Tae kyu An,<sup>b</sup> Chan Eon Park<sup>b\*</sup> and Yun-Hi Kim<sup>a\*</sup>

<sup>a</sup>Department of Chemistry & ERI, Gyeongsang National University, Jin-ju, 660-701, Republic of Korea

<sup>b</sup>POSTECH Organic Electronics Laboratory, Department of Chemical Engineering, Pohang University of Science and Technology, Pohang, 790-784, Republic of Korea

<sup>c</sup>School of Materials Science & ERI, Gyeongsang National University, Jin-ju, 660-701, Republic of Korea

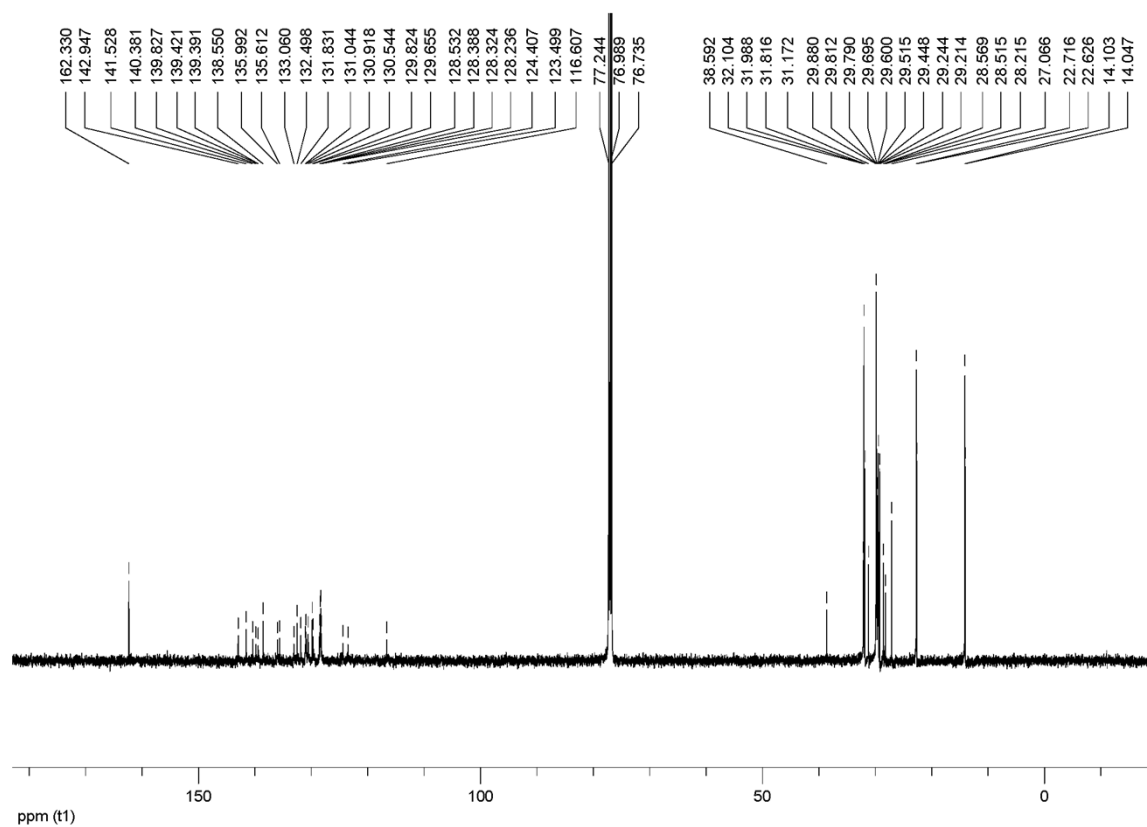

**Fig. S1.**  $^{13}\text{C}$  NMR spectra of DTBDT-TTPD

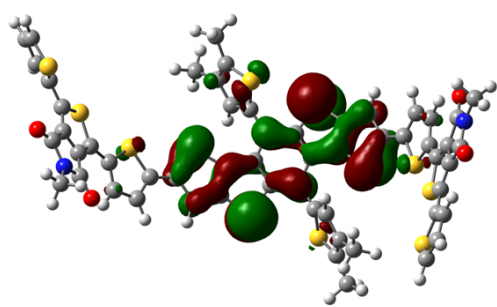

**HOMO: -5.25 eV**

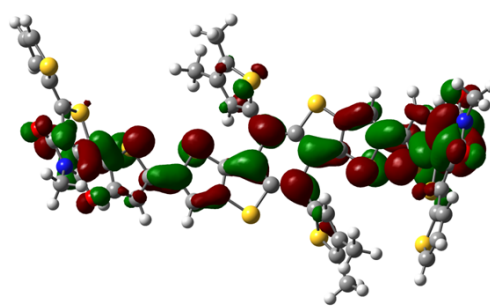

**LUMO: -2.74 eV**

**Fig. S2.** HOMO and LUMO surface plots for **DTBDT-TTPD**

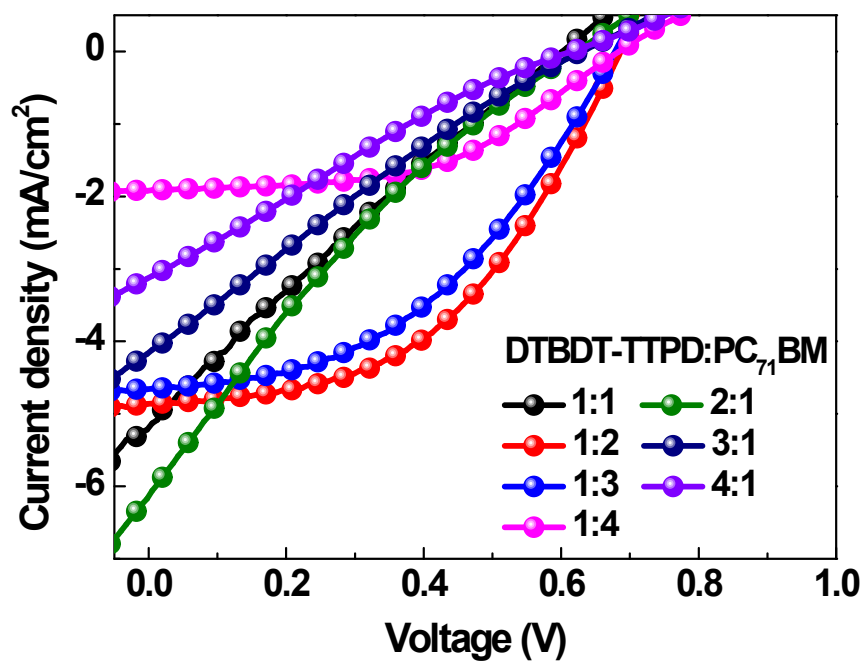

**Fig. S3.**  $J$ - $V$  curves for DTBDT-TTPD:PC<sub>71</sub>BM devices at various ratios in chloroform under an illumination of AM 1.5G, 100mW/cm<sup>2</sup>

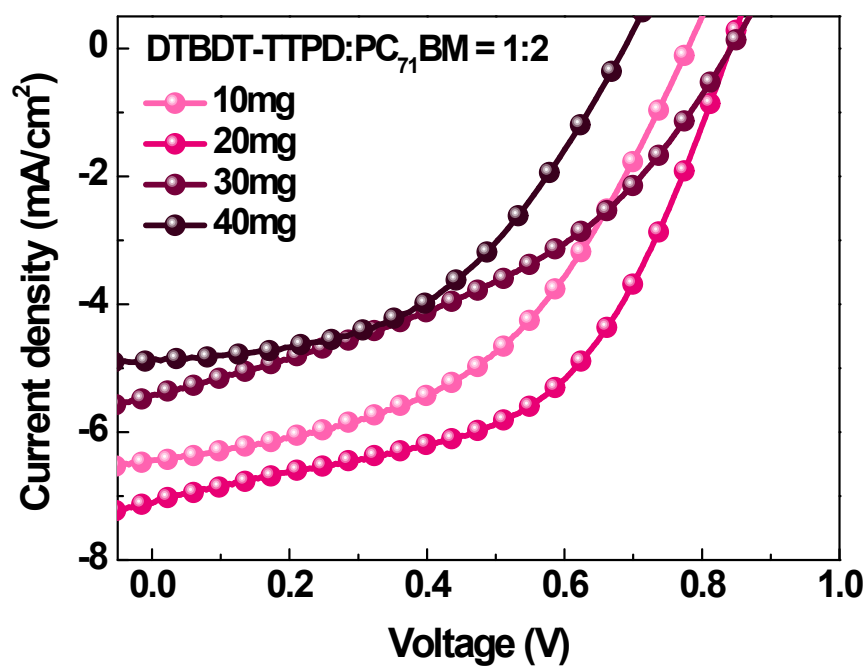

**Fig. S4.** *J-V* characteristics of the DTBDT-TTPD based solar cells with different material concentrations (DTBDT-TTPD:PC<sub>71</sub>BM = 1:2 w/w).

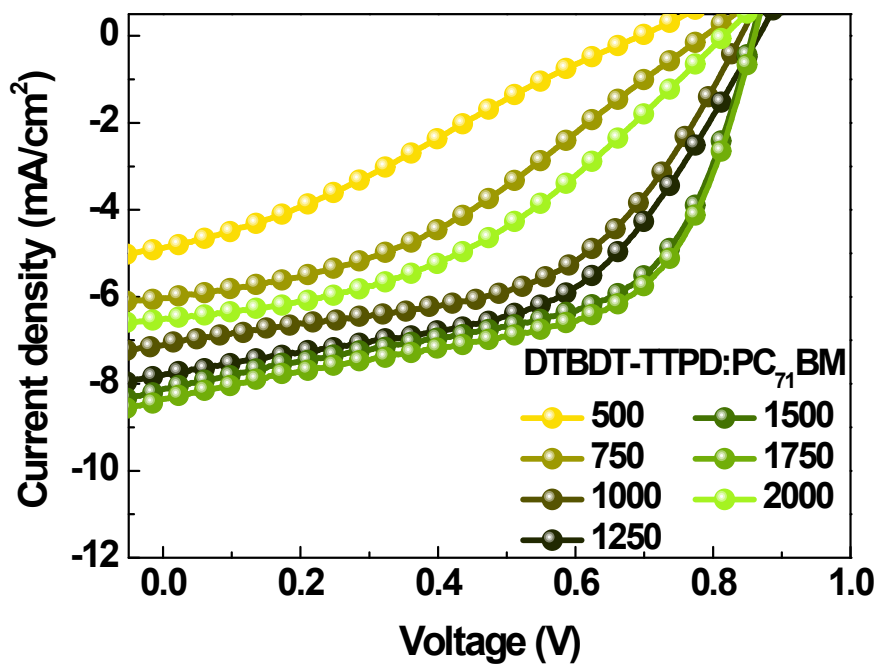

**Fig. S5.** Photocurrent-voltage ( $J$ - $V$ ) curves (AM 1.5G, 100mW cm<sup>-2</sup>) of the **DTBDT-TTPD:PC<sub>71</sub>BM** (1:2 w/w) blend photovoltaic cells as a function of the active layer thickness.

**Table S1.** Summary of device parameters at various **DTBDT-TTPD/PC<sub>71</sub>BM** compositions blended in chloroform.

| Small molecule : PCBM               | Blend ratios | $V_{oc}$<br>(V) | $J_{sc}$<br>(mA / cm <sup>2</sup> ) | FF<br>(%) | PCE<br>(%) |
|-------------------------------------|--------------|-----------------|-------------------------------------|-----------|------------|
|                                     | 1:1          | 0.60            | 5.2                                 | 23.3      | 0.73       |
|                                     | 1:2          | 0.68            | 4.9                                 | 48.4      | 1.61       |
|                                     | 1:3          | 0.67            | 4.7                                 | 44.8      | 1.34       |
| <b>DTBDT-TTPD:PC<sub>71</sub>BM</b> | 1:4          | 0.68            | 1.9                                 | 50.3      | 0.67       |
|                                     | 2:1          | 0.62            | 6.2                                 | 20.1      | 0.77       |
|                                     | 3:1          | 0.63            | 4.2                                 | 22.8      | 0.60       |
|                                     | 4:1          | 0.62            | 3.1                                 | 22.7      | 0.43       |

**Table S2.** Photovoltaic data of the **DTBDT-TTPD/PC<sub>71</sub>BM** (1:2 w/w) at various material concentration conditions

| Small molecule : PCBM               | Total concentration (mg/ml) | $V_{oc}$ (V) | $J_{sc}$ (mA / cm <sup>2</sup> ) | FF (%) | PCE (%) |
|-------------------------------------|-----------------------------|--------------|----------------------------------|--------|---------|
|                                     | 10                          | 0.78         | 6.4                              | 47.5   | 2.38    |
| <b>DTBDT-TTPD:PC<sub>71</sub>BM</b> | 20                          | 0.84         | 7.1                              | 52.0   | 3.10    |
|                                     | 30                          | 0.84         | 5.4                              | 40.6   | 1.85    |
|                                     | 40                          | 0.68         | 4.9                              | 48.4   | 1.61    |



**Table S3.** Summary of the photovoltaic properties of **DTBDT-TTPD:PC<sub>71</sub>BM** BHJ solar cells as a function of active layer thickness.

| Small molecule : PCBM               | Active layer Thickness (nm) | $V_{oc}$ (V) | $J_{sc}$ (mA / cm <sup>2</sup> ) | FF (%) | PCE (%) |
|-------------------------------------|-----------------------------|--------------|----------------------------------|--------|---------|
|                                     | 160                         | 0.70         | 4.9                              | 28.9   | 0.97    |
|                                     | 145                         | 0.80         | 6.0                              | 37.8   | 1.80    |
|                                     | 125                         | 0.84         | 7.1                              | 52.0   | 3.10    |
| <b>DTBDT-TTPD:PC<sub>71</sub>BM</b> | 100                         | 0.87         | 7.8                              | 51.3   | 3.47    |
|                                     | 92                          | 0.86         | 8.0                              | 55.3   | 3.81    |
|                                     | 85                          | 0.86         | 8.4                              | 54.8   | 3.95    |
|                                     | 60                          | 0.82         | 6.5                              | 41.4   | 2.20    |
